# Supplementary material for: A Simple Prognostic Score for Critical COVID-19 Derived from Patients without Comorbidities Performs Well in Unselected Patients
Source: MDPI journal article supplement (doi:10.3390/jcm11071810), 2022-03-25

## **Supplementary file for**

### **A simple prognostic score for critical COVID-19 derived from patients without comorbidities performs well in unselected patients**

Vasiliki E.Georgakopoulou<sup>1\*</sup>, Nikolaos I. Vlachogiannis<sup>2\*</sup>, Dimitrios Basoulis<sup>1</sup>, Irene Eliadi<sup>1</sup>, Georgios Georgiopoulos<sup>3</sup>, Georgios Karamanakis<sup>1</sup>, Sotiria Makrodimitri<sup>1</sup>, Stamatia Samara<sup>1</sup>, Maria Triantafyllou<sup>1</sup>, Pantazis M. Voutsinas<sup>1</sup>, Fotinie Ntziora<sup>2</sup>, Mina Psychogiou<sup>1</sup>, Michael Samarkos<sup>1</sup>, Petros P. Sfikakis<sup>2</sup>, Nikolaos V.Sipsas<sup>1,4</sup>

1. Infectious Diseases and COVID-19 Unit, General Hospital of Athens Laiko, Medical School, National and Kapodistrian University of Athens, 11527 Athens, Greece.

2. First Department of Propaedeutic Internal Medicine and Joint Academic Rheumatology Program, Medical School, National and Kapodistrian University of Athens, 11527 Athens, Greece.

3. Department of Clinical Therapeutics, Medical School, National and Kapodistrian University of Athens, 11528 Athens, Greece.

4. Pathophysiology Department, Medical School, National and Kapodistrian University of Athens, 11527 Athens, Greece.

\*equal contribution

Short title: Prognostic score for critical COVID-19

Correspondence: nsipsas@med.uoa.gr

**Table S1. Sensitivity and specificity of ROC-defined cutoffs for fibrinogen, LDH and CRP used to calculate the score for prediction of critical disease in the absence of comorbidities (derivation cohort).**

|                                                                                                                    | <b>Sensitivity (%)</b> | <b>Specificity (%)</b> |
|--------------------------------------------------------------------------------------------------------------------|------------------------|------------------------|
| Fibrinogen > 616.5 mg/dL                                                                                           | 77.3                   | 76.4                   |
| LDH > 380.5 U/L                                                                                                    | 77.3                   | 68.3                   |
| CRP > 61.765 mg/L                                                                                                  | 90.9                   | 68.7                   |
| <u>Abbreviations:</u> ROC: receiver operator characteristic; LDH: lactate dehydrogenase , CRP: C-reactive protein. |                        |                        |

**Table S2. Association of high CRP, LDH and fibrinogen (above ROC-defined cutoffs) with critical COVID-19 in the absence of comorbidities (derivation cohort).**

|                                                                                                                                                                                                                      | <b>Coefficient*</b> | <b>OR (95% CI)*</b> | <b>P-value</b> |
|----------------------------------------------------------------------------------------------------------------------------------------------------------------------------------------------------------------------|---------------------|---------------------|----------------|
| Fibrinogen > 616.5 mg/dL                                                                                                                                                                                             | 1.33                | 3.79 (1.17-12.29)   | 0.026          |
| LDH > 380.5 U/L                                                                                                                                                                                                      | 1.24                | 3.47 (1.12-10.71)   | 0.031          |
| CRP > 61.765 mg/L                                                                                                                                                                                                    | 2.01                | 7.43 (1.44-38.34)   | 0.017          |
| * Coefficients and odds ratios were calculated using binary logistic regression with critical COVID-19 as the dependent variable and higher than ROC-defined cutoff fibrinogen, LDH or CRP as independent variables. |                     |                     |                |
| <u>Abbreviations:</u> OR: odds ratio, CI: confidence interval, LDH: lactate dehydrogenase , CRP: C-reactive protein.                                                                                                 |                     |                     |                |

**Figure S1. Flow-chart of the study design.**

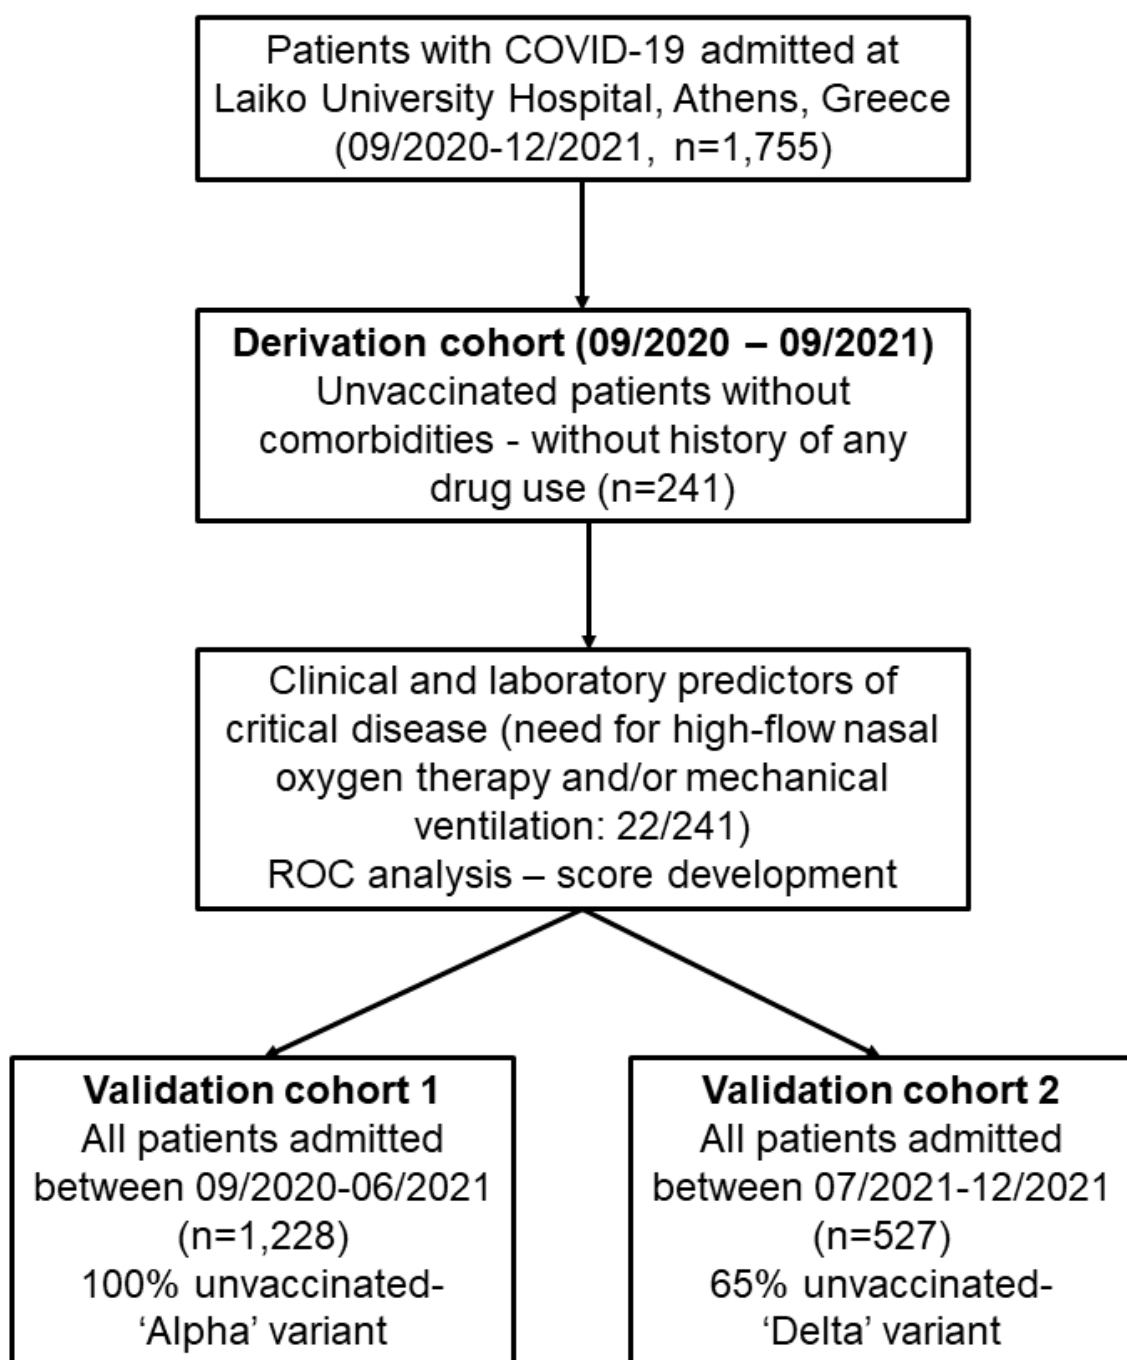

Supplement: s1 [file s1]
